# Supplementary material for: Serum levels of bupivacaine after pre-peritoneal bolus vs. epidural bolus injection for analgesia in abdominal surgery: A safety study within a randomized controlled trial
Source: PLoS One. 2017 Jun 14;12(6):e0178917. doi: 10.1371/journal.pone.0178917 (PMC5470670; doi:10.1371/journal.pone.0178917)
Supplement: S1 Table — (XLS) [file pone.0178917.s001.xls]

## Sheet: Blad1
Patient-substudy	group (0=CWI, 1=epidural)	sex (male=1)	Age	lenght (m)	weight (kg)	BMI	ASA class	Smoking status (Y=1, N=0)	pl-bupi 20min (ng/ml)	pl-bupi 40min (ng/ml)	pl-bupi 60min (ng/ml)	pl-bupi 80min (ng/ml)	Surgical time (min)	Noradrenaline use (mg)	Fluids given in OR (ml)	ketanest (mg)	sufentanil (mcg)
1	0	1	47	1.81	98	29.9	2	0	145.3	142.87	142.06	153.41	235	0	1483	25	100
2	1	0	46	1.52	50	21.6	1	0	46.35	54.83	64.98	73.34	423	2.8	13728	0	85
3	1	1	58	1.85	98	28.6	2	0	67.84	64.7	65.07	75.2	441	1.9	5029	0	95
4	1	1	87	1.8	75	23.2	3	0	45.18	59.61	61.28	64.13	262	1.9	1293	0	85
5	0	1	74	1.9	95	26.3	2	0	133.5	130.99	129.58	137.72	656	3.6	6276	0	65
6	0	1	59	1.92	108	29.3	2	0	87.49	88.67	94.09	94.75	463	0.8	3454	81	270
7	0	0	61	1.67	67	24	2	1	144.32	177.19	114.57	83.84	500	1.4	4318	20	100
8	0	1	71	1.8	68	21	1	0	62.46	84.58	92.85	49.03	178	0.5	2379	68	40
9	1	0	69	1.65	60	22	2	1	44.32	59	76.4	79.4	101	0.5	1114	0	40
10	1	0	85	1.5	45	20	2	0	200.63	150.5	154.61		157	1.5	2742	10	35
11	1	1	55	1.82	81	24.4	2	0	36.58	22.36	29.09	31.79	290	2.3	3661	0	0
12	0	0	34	1.72	85	24	3	0	81.91	66.65	88	57.94	401	1.7	4043	0	-99
13	1	1	85	1.86	86	24.9	2	0	24.99	12.45	10.84	12.7	184	0.6	1961	25	-99
14	0	1	55	1.86	105	30.4	2	0	135.49	98.87	58.03	57.25	205	0.1	3207	0	60
15	0	0	79	1.58	52	20.8	2	0	6.47	1.24	96.35	114.6	193	0.2	1688	0	60
16	0	1	66	1.77	70	22.3	2	1	9.68	105.6	150.63	106.38	134	0.2	1529	0	45
17	1	0	77	1.72	79	26.7	2	0	16.23	17.18	15.8	14.34	182	0.3	1643	0	37
18	1	1	77	1.72	79	26.7	2	0	18.62	19.22	19.23		121	0.2	1120	0	50
19	0	1	45	1.84	68	20.1	1	0	137.98	103.98	114.08	96.75	224	0	2608	53	30
20	1	0	72	1.62	68	25.9	2	0	38.22	40.72	36.04	31.87	59	0.1	559	0	27
